# Supplementary material for: Transcriptome‐based target‐enrichment baits for stony corals (Cnidaria: Anthozoa: Scleractinia)
Source: PubMed Central journal article supplement (PMC7468246; doi:10.1111/1755-0998.13150), 2020-03-24
Supplement: MEN-20-807-s001.pdf [file MEN-20-807-s001.pdf]

**Supplemental Information for:****Transcriptome-based target-enrichment baits for stony corals (Cnidaria: Anthozoa: Scleractinia)**

Randolph Z.B. Quek, Sudhanshi S. Jain, Mei Lin Neo, Greg W. Rouse, Danwei Huang

**Table S1.** List of COI and histone H3 sequences used in the design of barcoding baits. Bold species denote samples sequenced in this study. Asterisks indicate that reference can be found in the main text.

| <b>Species</b>                               | <b>Accession no.</b> | <b>Reference</b>             |
|----------------------------------------------|----------------------|------------------------------|
| <b>COI</b>                                   |                      |                              |
| <i>Acanthastrea pachysepta</i>               | LN999910             | Huang et al. (2016)*         |
| <i>Acropora palmata</i>                      | AB441246             | Fukami et al. (2008)*        |
| <i>Agaricia humilis</i>                      | AB441219             | Fukami et al. (2008)*        |
| <i>Alveopora spongiosa</i>                   | AB907092             | Kitano et al. (2014)*        |
| <i>Anacropora forbesi</i>                    | AB441251             | Fukami et al. (2008)*        |
| <i>Anomastrea irregularis</i>                | AM494869             | Stefani et al. (2007)        |
| <i>Anthemiphyllia patera</i>                 | HM018604             | Kitahara et al. (2010)*      |
| <i>Astrea curta</i>                          | HQ203286             | Huang et al. (2011)*         |
| <i>Astroides calycularis</i>                 | JQ343126             | Merino-Serrais et al. (2012) |
| <i>Balanophyllia (Balanophyllia) elegans</i> | DQ445805             | Hellberg (2006)              |
| <i>Bernardpora stutchburyi</i>               | AB907061             | Kitano et al. (2014)*        |
| <i>Blastomussa loyae</i>                     | HF954191             | Benzoni et al. (2014)        |
| <i>Caryophyllia (Caryophyllia) ralphae</i>   | HM018617             | Kitahara et al. (2010)*      |
| <i>Caulastrea tumida</i>                     | HQ203249             | Huang et al. (2011)*         |
| <i>Cladocora arbuscula</i>                   | AB117292             | Fukami et al. (2004)*        |
| <i>Cladopsammia eguchii</i>                  | HG965317             | Arrigoni et al. (2014)       |
| <i>Coelastrea palauensis</i>                 | EU371699             | Huang et al. (2008)*         |
| <i>Colpophyllia natans</i>                   | AB117228             | Fukami et al. (2004)*        |
| <i>Conotrochus funiculumna</i>               | HM018621             | Kitahara et al. (2010)*      |
| <i>Coscinaraea columna</i>                   | AB441210             | Fukami et al. (2008)*        |
| <i>Craterastrea levis</i>                    | HE978509             | Benzoni et al. (2012)        |
| <i>Ctenactis crassa</i>                      | LC191439             | Oku et al. (2017)            |

| <b>Species</b>                                   | <b>Accession no.</b> | <b>Reference</b>           |
|--------------------------------------------------|----------------------|----------------------------|
| <i>Ctenella chagius</i>                          | AB441208             | Fukami et al. (2008)*      |
| <i>Cyathelia axillaris</i>                       | HM018622             | Kitahara et al. (2010)*    |
| <i>Cyathotrochus pileus</i>                      | HM018623             | Kitahara et al. (2010)*    |
| <i>Cycloseris vaughani</i>                       | LC191476             | Oku et al. (2017)          |
| <i>Cynarina lacrymalis</i>                       | AB117246             | Fukami et al. (2004)*      |
| <i>Dactylostrochus cervicornis</i>               | HM018624             | Kitahara et al. (2010)*    |
| <i>Danafungia horrida</i>                        | LC191483             | Oku et al. (2017)          |
| <i>Dasmosmilia cf. lymani</i>                    | HM018625             | Kitahara et al. (2010)*    |
| <i>Deltocyathus suluensis</i>                    | HM018631             | Kitahara et al. (2010)*    |
| <i>Dendrogyra cylindrus</i>                      | AB117299             | Fukami et al. (2004)*      |
| <i>Desmophyllum dianthus</i>                     | JQ611387             | Addamo et al. (2012)       |
| <i>Dichocoenia stokesii</i>                      | AY451360             | Shearer & Coffroth (2008)  |
| <i>Diploastrea heliopora</i>                     | EU371660             | Huang et al. (2008)*       |
| <i>Diploria labyrinthiformis</i>                 | AB117224             | Fukami et al. (2004)*      |
| <i>Dipsastraea amicornum</i>                     | AB441193             | Fukami et al. (2008)*      |
| <i>Dipsastraea favus</i>                         | AB117267             | Fukami et al. (2004)*      |
| <i>Duncanopsammia axifuga</i>                    | HG965325             | Arrigoni et al. (2014)     |
| <i>Echinophyllia echinoporoides</i>              | LT605258             | Arrigoni et al. (2016a)    |
| <i>Echinopora pacifica</i>                       | AB117261             | Fukami et al. (2004)*      |
| <i>Eguchipsammia serpentina</i>                  | HG965327             | Arrigoni et al. (2014)     |
| <i>Enallopsammia rostrata</i>                    | HM018632             | Kitahara et al. (2010)*    |
| <i>Eusmilia fastigiata</i>                       | AB117294             | Fukami et al. (2004)*      |
| <i>Favites abdita</i>                            | HQ203267             | Huang et al. (2011)*       |
| <i>Flabellum (Flabellum) vaughani</i>            | HM018644             | Kitahara et al. (2010)*    |
| <i>Fungiacyathus (Bathyactis) turbinolioides</i> | HM018648             | Kitahara et al. (2010)*    |
| <i>Galaxea fascicularis</i>                      | AB441201             | Fukami et al. (2008)*      |
| <i>Gardineria paradoxa</i>                       | GQ868681             | Stolarski et al. (2011)*   |
| <i>Gardineroseris planulata</i>                  | AB441218             | Fukami et al. (2008)*      |
| <i>Goniastrea retiformis</i>                     | EU371701             | Huang et al. (2008)*       |
| <i>Goniopora columna</i>                         | AB907032             | Kitano et al. (2014)*      |
| <i>Halomitra pileus</i>                          | LC191477             | Oku et al. (2017)          |
| <i>Heliofungia actiniformis</i>                  | EU149876             | Gittenberger et al. (2011) |

| <b>Species</b>                  | <b>Accession no.</b> | <b>Reference</b>          |
|---------------------------------|----------------------|---------------------------|
| <i>Helioseris cucullata</i>     | AB441221             | Kitahara et al. (2008)*   |
| <i>Herpolitha limax</i>         | AB441223             | Kitahara et al. (2008)*   |
| <i>Heteropsammia cochlea</i>    | HG965330             | Arrigoni et al. (2014a)   |
| <i>Homophyllia australis</i>    | LN875864             | Arrigoni et al. (2016b)   |
| <i>Homophyllia bowerbanki</i>   | LN875878             | Arrigoni et al. (2016b)   |
| <i>Horastrea indica</i>         | AM494865             | Stefani et al. (2007)     |
| <i>Hydnophora exesa</i>         | JQ920443             | Unpublished               |
| <i>Isophyllia sinuosa</i>       | AB117238             | Fukami et al. (2004)*     |
| <i>Isopora palifera</i>         | AB441248             | Fukami et al. (2008)*     |
| <i>Javania</i> sp.              | HM018654             | Kitahara et al. (2010)*   |
| <i>Leptastrea pruinosa</i>      | AB441196             | Fukami et al. (2008)*     |
| <i>Leptopsammia pruvoti</i>     | HG965332             | Arrigoni et al. (2014a)   |
| <i>Leptoria phrygia</i>         | HE654611             | Arrigoni et al. (2012)    |
| <i>Letepsammia formosissima</i> | GQ868684             | Storlarski et al. (2011)* |
| <i>Lithophyllon scabra</i>      | LC191482             | Oku et al. (2017)         |
| <i>Lobactis scutaria</i>        | AB441224             | Fukami et al. (2008)*     |
| <i>Madracis asanoi</i>          | HM018656             | Kitahara et al. (2010)*   |
| <i>Madrepora oculata</i>        | HM018659             | Kitahara et al. (2010)*   |
| <i>Manicina areolata</i>        | AB117227             | Fukami et al. (2004)*     |
| <i>Meandrina brasiliensis</i>   | AB117297             | Fukami et al. (2004)*     |
| <i>Merulina ampliata</i>        | AB117283             | Fukami et al. (2004)*     |
| <i>Micromussa amakusensis</i>   | HE654643             | Arrigoni et al. (2012)    |
| <i>Montastraea cavernosa</i>    | AB117289             | Fukami et al. (2004)*     |
| <i>Montipora capitata</i>       | HQ246613             | Forsman et al. (2010)     |
| <i>Moseleya latistellata</i>    | HQ203293             | Huang et al. (2011)*      |
| <i>Mussa angulosa</i>           | AB117239             | Fukami et al. (2004)*     |
| <i>Mussismilia hispida</i>      | AB117233             | Fukami et al. (2004)*     |
| <i>Mycedium elephantotus</i>    | AB117388             | Fukami et al. (2004)*     |
| <i>Mycetophyllia danaana</i>    | AB117234             | Fukami et al. (2004)*     |
| <i>Nemanzophyllia turbida</i>   | HF954193             | Benzoni et al. (2014)     |
| <i>Oculina diffusa</i>          | AB117293             | Fukami et al. (2004)*     |
| <i>Orbicella faveolata</i>      | KF579908             | Kirk et al. (2013)        |

| <b>Species</b>                     | <b>Accession no.</b> | <b>Reference</b>           |
|------------------------------------|----------------------|----------------------------|
| <i>Oulastrea crispata</i>          | FJ345435             | Huang et al. (2009)        |
| <i>Oulophyllia crispa</i>          | AB117276             | Fukami et al. (2004)*      |
| <i>Oxypora lacera</i>              | LT605275             | Arrigoni et al. (2016a)    |
| <i>Pachyseris speciosa</i>         | AB441222             | Fukami et al. (2008)*      |
| <i>Paramontastraea peresi</i>      | HE654598             | Arrigoni et al. (2012)     |
| <i>Pavona cactus</i>               | AB441216             | Fukami et al. (2008)*      |
| <i>Pectinia paeonia</i>            | AB117386             | Fukami et al. (2004)*      |
| <i>Phyllangia papuensis</i>        | HM018660             | Kitahara et al. (2010)*    |
| <i>Physogyra lichtensteini</i>     | KU762014             | Unpublished                |
| <i>Placotrochides scaphula</i>     | HM018661             | Kitahara et al. (2010)*    |
| <i>Platygyra sinensis</i>          | HM018662             | Kitahara et al. (2010)*    |
| <i>Plerogyra</i> sp.               | HM018663             | Kitahara et al. (2010)*    |
| <i>Plesiastrea versipora</i>       | FR837984             | Benzoni et al. (2011)      |
| <i>Pleuractis moluccensis</i>      | LC191471             | Oku et al. (2017)          |
| <i>Podabacia</i> sp.               | EU149888             | Gittenberger et al. (2011) |
| <i>Polyphyllia talpina</i>         | EU149915             | Gittenberger et al. (2011) |
| <i>Porites rus</i>                 | FJ423979             | Forsman et al. (2009)      |
| <i>Pourtalosmia anthophyllites</i> | JQ611390             | Addamo et al. (2012)       |
| <i>Psammocora contigua</i>         | AB441209             | Fukami et al. (2008)*      |
| <i>Pseudodiploria strigosa</i>     | KF579902             | Kirk et al. (2013)         |
| <i>Pseudosiderastrea tayamai</i>   | AM494866             | Stefani et al. (2007)      |
| <i>Rhizopsammia wettsteini</i>     | HG965337             | Arrigoni et al. (2014)     |
| <i>Rhizosmia robusta</i>           | HM018664             | Kitahara et al. (2010)*    |
| <i>Rhombopsammia niphada</i>       | GQ868683             | Storlarski et al. (2011)*  |
| <i>Sandalolitha dentata</i>        | EU149914             | Gittenberger et al. (2011) |
| <i>Scapophyllia cylindrica</i>     | FJ345444             | Huang et al. (2009)        |
| <i>Sclerophyllia maxima</i>        | LM993329             | Arrigoni et al. (2014a)*   |
| <i>Scolymia cubensis</i>           | AB117236             | Fukami et al. (2004)*      |
| <i>Seriatopora hystrix</i>         | AB441234             | Fukami et al. (2008)*      |
| <i>Siderastrea siderea</i>         | AB441211             | Fukami et al. (2008)*      |
| <i>Solenastrea bournoni</i>        | AB117291             | Fukami et al. (2004)*      |
| <i>Stenocyathus vermiformis</i>    | HM018619             | Kitahara et al. (2010)*    |

| <b>Species</b>                                     | <b>Accession no.</b> | <b>Reference</b>           |
|----------------------------------------------------|----------------------|----------------------------|
| <i>Stephanocoenia intersepta</i>                   | AB441228             | Fukami et al. (2008)*      |
| <i>Stephanocyathus (Acinocyathus) spiniger</i>     | HM018665             | Kitahara et al. (2010)*    |
| <i>Stylaraea punctata</i>                          | AB907071             | Kitano et al. (2014)*      |
| <i>Stylocoeniella guentheri</i>                    | AB441225             | Fukami et al. (2008)*      |
| <i>Trachyphyllia geoffroyi</i>                     | AB117287             | Fukami et al. (2004)*      |
| <i>Trochocyathus (Trochocyathus) rhombocolumna</i> | HM018668             | Kitahara et al. (2010)*    |
| <i>Tropidocyathus lessonii</i>                     | HM018669             | Kitahara et al. (2010)*    |
| <i>Truncatoflabellum</i> sp.                       | HM018673             | Kitahara et al. (2010)*    |
| <i>Tubastraea coccinea</i>                         | DQ445807             | Hellberg (2006)            |
| <i>Turbinaria peltata</i>                          | AB441240             | Fukami et al. (2008)*      |
| <i>Zoopilus echinatus</i>                          | EU149916             | Gittenberger et al. (2011) |
| <b>H3</b>                                          |                      |                            |
| <i>Acanthastrea rotundoflora</i>                   | LK022410             | Arrigoni et al. (2014b)_   |
| <i>Acropora muricata</i>                           | M60509               | Miller et al. (1990)       |
| <i>Astrea curta</i>                                | HQ203604             | Huang et al. (2011)*       |
| <i>Astreopora expansa</i>                          | REL0022              | MN965796                   |
| <i>Bernardpora stutchburyi</i>                     | REL0029              | MN965801                   |
| <i>Caulastraea tumida</i>                          | HQ203524             | Huang et al. (2011)*       |
| <i>Coelastrea aspera</i>                           | KJ666170             | Huang et al. (2014a)*      |
| <i>Cynarina lacrymalis</i>                         | LK022419             | Arrigoni et al. (2014b)_   |
| <i>Cyphastrea microphthalma</i>                    | LT575763             | Arrigoni et al. (2017)     |
| <i>Diploastrea heliopora</i>                       | HQ203531             | Huang et al. (2011)*       |
| <i>Dipsastraea matthaii</i>                        | HQ203553             | Huang et al. (2011)*       |
| <i>Oxypora echinata</i>                            | LK022415             | Arrigoni et al. (2014b)_   |
| <i>Fimbriaphyllia ancora</i>                       | REL0024              | MN965798                   |
| <i>Favites valenciennesii</i>                      | HQ203611             | Huang et al. (2011)*       |
| <i>Fungia fungites</i>                             | REL0067              | MN965805                   |
| <i>Galaxea astreata</i>                            | REL0020              | MN965795                   |
| <i>Goniastrea retiformis</i>                       | KJ666252             | Huang et al. (2014a)*      |
| <i>Goniopora stokesi</i>                           | REL0140              | MN965807                   |
| <i>Heliofungia actiniformis</i>                    | REL0153              | MN965808                   |
| <i>Herpolitha limax</i>                            | REL0026              | MN965800                   |

| <b>Species</b>                       | <b>Accession no.</b> | <b>Reference</b>         |
|--------------------------------------|----------------------|--------------------------|
| <i>Homophyllia australis</i>         | LN875938             | Arrigoni et al. (2016b)  |
| <i>Hydnophora microconos</i>         | HQ203594             | Huang et al. (2011)*     |
| <i>Leptoria phrygia</i>              | HQ203597             | Huang et al. (2011)*     |
| <i>Lobophyllia valenciennesii</i>    | LK022427             | Arrigoni et al. (2014b)_ |
| <i>Merulina triangularis</i>         | KJ666292             | Huang et al. (2014a)*    |
| <i>Micromussa amakusensis</i>        | LK022401             | Arrigoni et al. (2014b)_ |
| <i>Montastraea cavernosa</i>         | HQ203601             | Huang et al. (2011)*     |
| <b><i>Montipora stellata</i></b>     | REL0059              | MN965804                 |
| <i>Moseleya latistellata</i>         | HQ203614             | Huang et al. (2011)*     |
| <i>Mycedium robokaki</i>             | HQ203616             | Huang et al. (2011)*     |
| <i>Orbicella annularis</i>           | HQ203600             | Huang et al. (2011)*     |
| <b><i>Oulastrea crispata</i></b>     | REL0016              | MN965794                 |
| <i>Oulophyllia crispa</i>            | HQ203620             | Huang et al. (2011)*     |
| <i>Oxypora lacera</i>                | LK022417             | Arrigoni et al. (2014b)_ |
| <b><i>Pachyseris speciosa</i></b>    | REL0025              | MN965799                 |
| <i>Paragoniastrea russelli</i>       | KJ666178             | Huang et al. (2014a)*    |
| <b><i>Pavona decussata</i></b>       | REL00139             | MN965809                 |
| <i>Pectinia paeonia</i>              | HQ203624             | Huang et al. (2011)*     |
| <i>Micromussa multipunctata</i>      | HQ203608             | Huang et al. (2011)*     |
| <i>Physophyllia ayleni</i>           | HQ203622             | Huang et al. (2011)*     |
| <i>Platygyra pini</i>                | HQ203631             | Huang et al. (2011)*     |
| <i>Plesiastrea versipora</i>         | HQ203518             | Huang et al. (2011)*     |
| <b><i>Polyphyllia talpina</i></b>    | REL0056              | MN965803                 |
| <b><i>Porites monticulosa</i></b>    | REL0124              | MN965806                 |
| <i>Scapophyllia cylindrica</i>       | HQ203637             | Huang et al. (2011)*     |
| <i>Trachyphyllia geoffroyi</i>       | HQ203638             | Huang et al. (2011)*     |
| <b><i>Tubastraea diaphana</i></b>    | REL0052              | MN965802                 |
| <b><i>Turbinaria mesenterina</i></b> | REL0023              | MN965797                 |

#### **Additional References**

Addamo, A. M., Reimer, J. D., Taviani, M., Freiwald, A., & Machordom, A. (2012). *PLoS ONE*, 7(11), E50215.

- Arrigoni, R., Berumen, M. L., Chen, C. A., Terraneo, T., Baird, A. H., Payri, C. & Benzoni, F. (2016a). *Molecular Phylogenetics and Evolution*, 105, 146–159.
- Arrigoni, R., Benzoni, F., Huang, D., Fukami, H., Chen, C. A., ... Baird, A. H. (2016b). *Contributions to Zoology*, 85(4), 387–422.
- Arrigoni, R., Kitano, Y. F., Stolarski, J., Hoeksema, B., ... Benzoni, F. (2014a). *Zoological Scripta*, 43(6), 661–688.
- Arrigoni, R., Richards, Z. T., Chen, C. A., Baird, A. H., & Benzoni, F. (2014b). *Contributions to Zoology*, 83(3), 195–215.
- Arrigoni, R., Stefani, F., Pichon, M., Galli, P. & Benzoni, F. (2012). *Molecular Phylogenetics and Evolution*, 65(1), 183–193.
- Benzoni, F., Arrigoni, R., Stefani, F. & Pichon, M. (2011). *Contributions to Zoology*, 80(4), 231–249.
- Benzoni, F., Arrigoni, R., Stefani, F. & Stolarski, J. (2012). *Systematics and Biodiversity*, 10(4), 417–433.
- Benzoni, F., Arrigoni, R., Waheed, Z., Stefani, F. & Hoeksema, B. W. (2014). *Raffles Bulletin of Zoology*, 62, 358–378.
- Forsman, Z. H., Barshis, D. J., Hunter, C. L., & Toonen, R. J. (2009). *BMC Evolutionary Biology*, 9, 45.
- Forsman, Z. H., Concepcion, G. T., Haverkort, R. D., Shaw, R. W., Maragos, J. E. & Toonen, R. J. (2010). *PLoS ONE*, 5(12), E15021.
- Gittenberger, A., Reijnen, B. T. & Hoeksema, B. W. (2011). *Contributions to Zoology*, 80(2), 107–132.
- Hellberg, M. E. (2006). *BMC Evolutionary Biology*, 6, 24.
- Huang, D., Meier, R., Todd, P. A. & Chou, L. M. (2009). *Molecular Phylogenetics and Evolution*, 50(1), 102–116.
- Kirk, N. L., Ritson-Williams, R., Cofforth, M. A., Miller, M. W., Fogarty, N. D. & Santos, S. R. (2013). *PLoS ONE*, 8(11), E80618.
- Merino-Serrais, P. M., Casado-Amezua, P., Vicente, O. O. & Templado, J. (2012). *Graellsia*, 68(1), 207–218.
- Miller, D. J., McMillan, J., Miles, A., ten Lohuis, M. & Mahony, T. (1990). *Gene*, 93(4), 319–320.
- Oku, Y., Naruse, T. & Fukami, H. (2017). *Zoological Scripta*, 34(3), 242–251.
- Shearer, T. L. & Croffroth, M. A. (2008). *Molecular Ecology Resources*, 8(2), 247–255.
- Stefani, F., Benzoni, F., Michel, P., Cancelliere, C., & Galli, P. (2007) *Zoological Scripta*, 37(1), 71–91.

**Table S2.** Collection information for species sampled in this study. Also included are catalogue numbers of specimens deposited at the Zoological Reference Collection, Lee Kong Chian Natural History Museum (Singapore).

| <b>Species</b>                | <b>Location</b>    | <b>GPS coordinates</b> | <b>Catalog numbers</b> |
|-------------------------------|--------------------|------------------------|------------------------|
| <b>Scleractinia</b>           |                    |                        |                        |
| <i>Acropora aspera</i>        | Terumbu Raya       | 1.2138° N, 103.7530° E | ZRC.CNI.1418           |
| <i>Astreopora expansa</i>     | Sisters Islands    | 1.215° N, 103.8333° E  | ZRC.CNI.1419           |
| <i>Cyphastrea serailia</i>    | Pulau Hantu        | 1.2223°N, 103.7499° E  | ZRC.CNI.1427           |
| <i>Diploastrea heliopora</i>  | Raffles Lighthouse | 1.1600° N, 103.7409° E | ZRC.CNI.1426           |
| <i>Dipsastraea maxima</i>     | Terumbu Raya       | 1.2138° N, 103.7530° E | ZRC.CNI.1417           |
| <i>Fimbriaphyllia ancora</i>  | Raffles Lighthouse | 1.1600° N, 103.7409° E | ZRC.CNI.1425           |
| <i>Galaxea astreata</i>       | Pulau Hantu        | 1.2223°N, 103.7499° E  | ZRC.CNI.1429           |
| <i>Goniastrea retiformis</i>  | Terumbu Raya       | 1.2138° N, 103.7530° E | ZRC.CNI.1416           |
| <i>Goniopora lobata</i>       | St John's Island   | 1.2167° N, 103.8500° E | ZRC.CNI.1430           |
| <i>Herpolitha limax</i>       | Raffles Lighthouse | 1.1600° N, 103.7409° E | ZRC.CNI.1421           |
| <i>Lobophyllia radians</i>    | Raffles Lighthouse | 1.1600° N, 103.7409° E | ZRC.CNI.1415           |
| <i>Oulastrea crispata</i>     | Pulau Hantu        | 1.2223°N, 103.7499° E  | ZRC.CNI.1428           |
| <i>Pachyseris speciosa</i>    | Raffles Lighthouse | 1.1600° N, 103.7409° E | ZRC.CNI.1424           |
| <i>Platygyra sinensis</i>     | Sisters Islands    | 1.215° N, 103.8333° E  | ZRC.CNI.1413           |
| <i>Plesiastrea versipora</i>  | Kusu Island        | 1.2232° N, 103.8611° E | ZRC.CNI.1422           |
| <i>Pocillopora acuta</i>      | Sisters Islands    | 1.215° N, 103.8333° E  | ZRC.CNI.1423           |
| <i>Porites lobata</i>         | Pulau Hantu        | 1.2223°N, 103.7499° E  | ZRC.CNI.1420           |
| <i>Turbinaria mesenterina</i> | Pulau Hantu        | 1.2223°N, 103.7499° E  | ZRC.CNI.1414           |
| <b>Corallimorpharia</b>       |                    |                        |                        |
| <i>Rhodactis inchoata</i>     | Sisters Islands    | 1.215° N, 103.8333° E  | ZRC.CNI.1349           |
| <i>Rhodactis indosinensis</i> | Sisters Islands    | 1.215° N, 103.8333° E  | ZRC.CNI.1351           |



**Table S3.** Numbers of alignments, regions and baits designed based on reference genomes listed in Table 1.

| <b>Gene model</b>             | <b>Number of alignments</b> | <b>Number of regions</b> | <b>Number of baits</b> |
|-------------------------------|-----------------------------|--------------------------|------------------------|
| <i>Acropora digitifera</i>    | 51                          | 87                       | 1376                   |
| <i>Acropora tenuis</i>        | 27                          | 63                       | 788                    |
| <i>Fungia</i> sp.             | 48                          | 90                       | 1118                   |
| <i>Galaxea fascicularis</i>   | 80                          | 193                      | 2113                   |
| <i>Goniastrea aspera</i>      | 30                          | 73                       | 883                    |
| <i>Montastraea cavernosa</i>  | 86                          | 132                      | 2041                   |
| <i>Orbicella faveolata</i>    | 28                          | 40                       | 617                    |
| <i>Pocillopora damicornis</i> | 44                          | 56                       | 834                    |
| <i>Porites lutea</i>          | 84                          | 156                      | 2493                   |
| <i>Stylophora pistillata</i>  | 127                         | 249                      | 3656                   |

**Table S4.** Statistics of Illumina sequencing reads.

| <b>Species</b>                | <b>Raw reads</b> | <b>Trimmed reads<br/>(paired)</b> | <b>Mapped barcoding<br/>reads (reads / %)</b> |
|-------------------------------|------------------|-----------------------------------|-----------------------------------------------|
| <b>Scleractinia</b>           |                  |                                   |                                               |
| <i>Acropora aspera</i>        | 12,474,167       | 10,449,179                        | –                                             |
| <i>Astreopora expansa</i>     | 12,494,661       | 10,751,086                        | 5,489,096 / 51.06                             |
| <i>Cyphastrea serailia</i>    | 13,036,636       | 10,688,227                        | 3,995,496 / 37.38                             |
| <i>Diploastrea heliopora</i>  | 8,383,376        | 7,512,634                         | –                                             |
| <i>Dipsastraea maxima</i>     | 10,317,986       | 9,304,707                         | 3,972,234 / 42.69                             |
| <i>Fimbriaphyllia ancora</i>  | 11,045,605       | 9,045,157                         | 3,386,460 / 37.44                             |
| <i>Galaxea astreata</i>       | 16,119,962       | 14,368,535                        | 5,852,956 / 40.73                             |
| <i>Goniastrea retiformis</i>  | 12,483,736       | 10,839,136                        | –                                             |
| <i>Goniopora lobata</i>       | 6,220,293        | 4,941,626                         | –                                             |
| <i>Herpolitha limax</i>       | 9,627,166        | 8,699,061                         | 3,017,964 / 34.69                             |
| <i>Lobophyllia radians</i>    | 9,468,583        | 7,769,008                         | –                                             |
| <i>Oulastrea crispata</i>     | 8,603,319        | 7,625,188                         | 2,732,530 / 35.84                             |
| <i>Pachyseris speciosa</i>    | 8,585,709        | 7,585,519                         | 1,788,640 / 23.58                             |
| <i>Platygyra sinensis</i>     | 11,893,764       | 9,881,863                         | 2,293,294 / 23.21                             |
| <i>Plesiastrea versipora</i>  | 8,890,660        | 7,077,524                         | 1,440,808 / 20.36                             |
| <i>Pocillopora acuta</i>      | 6,597,280        | 5,664,946                         | –                                             |
| <i>Porites lobata</i>         | 9,948,439        | 9,089,241                         | 1,676,524 / 18.45                             |
| <i>Turbinaria mesenterina</i> | 9,925,475        | 8,679,417                         | –                                             |
| <b>Corallimorpharia</b>       |                  |                                   |                                               |
| <i>Rhodactis inchoata</i>     | 7,601,449        | 6,538,492                         | –                                             |
| <i>Rhodactis indosinensis</i> | 6,825,624        | 5,832,989                         | 1,290,036 / 22.12                             |

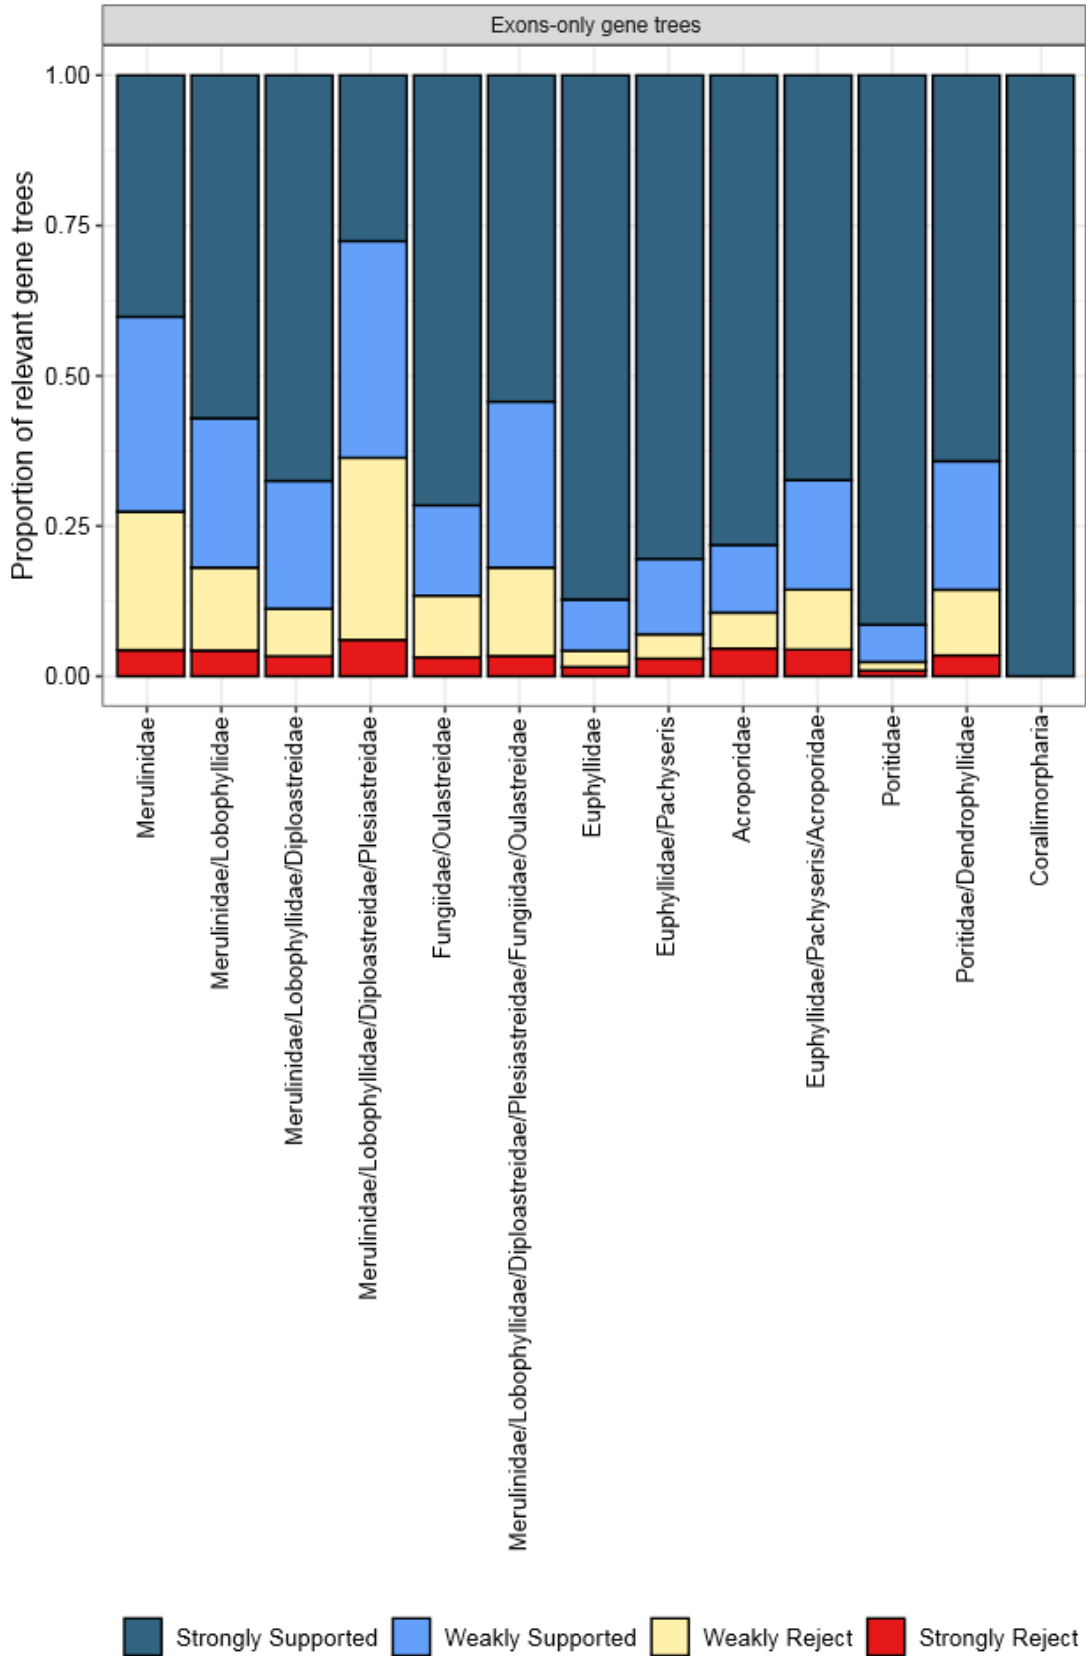

**Figure S1.** Proportion of maximum likelihood gene trees (RAxML) supporting family-level monophyly as inferred by DiscoVista compared to Figure 1.

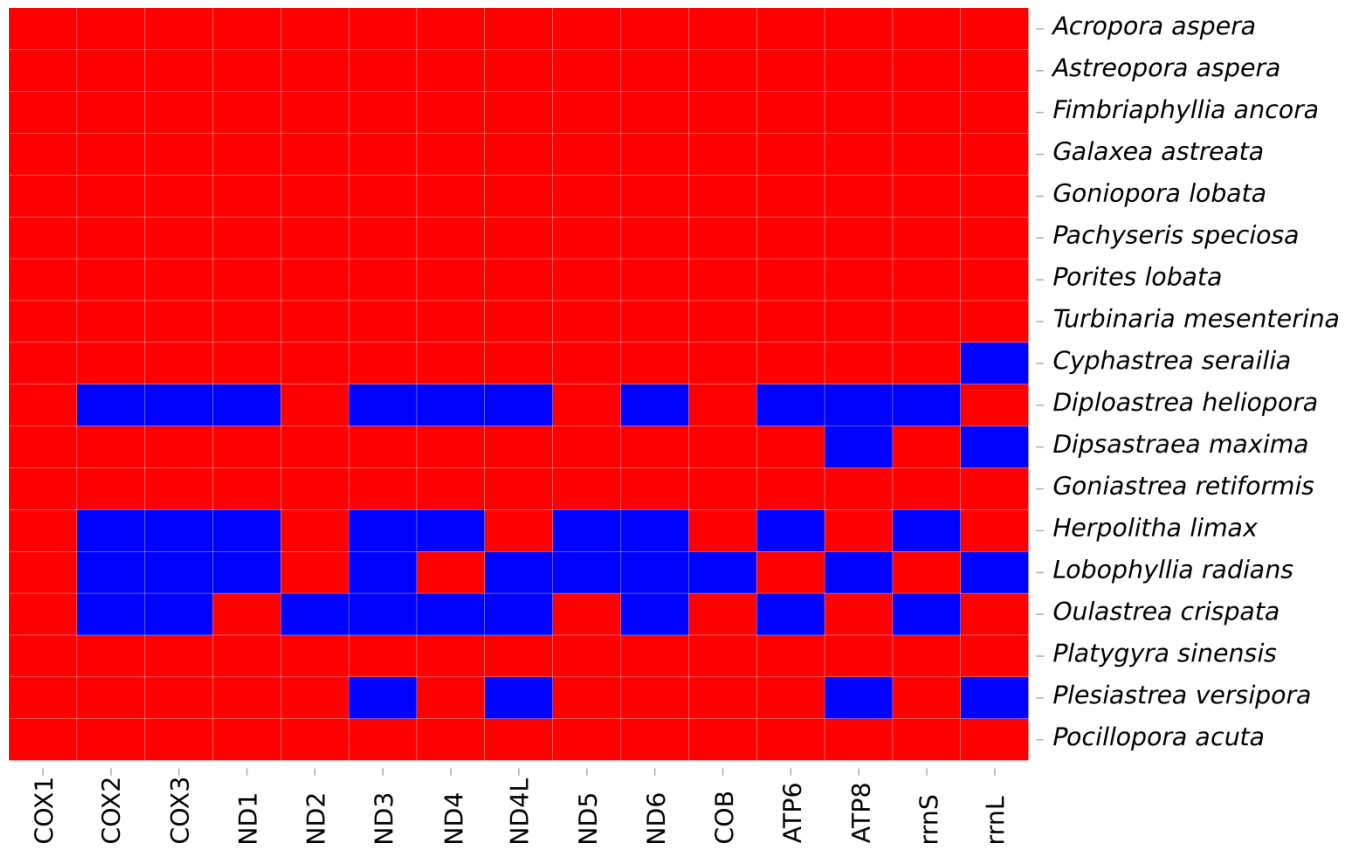

**Figure S2.** Coverage of mitogenomic signal recovered from assembly of trimmed reads as annotated by MITOS2 (red: present; blue: absent).

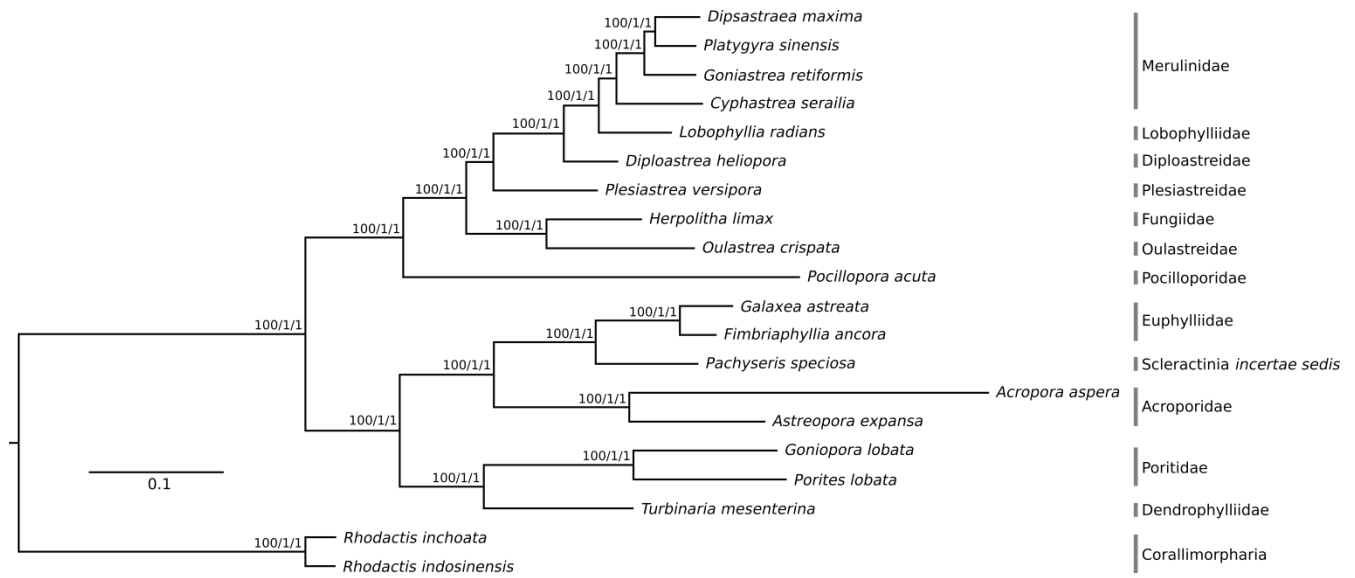

**Figure S3.** Maximum likelihood phylogeny of Scleractinia for exons-only dataset (minimum taxon occupancy of 3 scleractinian taxa per loci; 30.86% missing data; 452 loci over 865 exon regions; 201,137 bp) with *Rhodactis* as outgroup. Numbers on nodes represent bootstrap values (RAxML) / posterior probability (ExaBayes) / posterior probability (ASTRAL).
